# Supplementary material for: Kirkendall effect-assisted synthesis of hollow MoS2 nanospheres with interlayer expansion for improved magnesium diffusion kinetics and durability
Source: Royal Society of Chemistry journal article supplement (doi:10.1039/d4ta07625g), 2025-01-01
Supplement: d4ta07625g1.pdf [file d4ta07625g1.pdf]

Electronic Supplementary Information for

## **Kirkendall effect-assisted synthesis of hollow MoS<sub>2</sub> nanospheres with interlayer expansion for improved magnesium diffusion kinetics and durability**

Ruqi Cai,<sup>†a</sup> Han Qin,<sup>†a</sup> Xianbo Yu,<sup>\*a</sup> Feng Yan,<sup>\*b</sup> Xiangming Wang,<sup>a</sup> Yang Zhao,<sup>a</sup> Baoning Wang,<sup>a</sup> Xitian Zhang<sup>\*a</sup>

<sup>a</sup>Key Laboratory for Photonic and Electronic Bandgap Materials, Ministry of Education, School of Physics and Electronic Engineering, Harbin Normal University, Harbin 150025, China

<sup>b</sup>Key Laboratory of In-Fiber Integrated Optics, Ministry of Education, College of Physics and Optoelectronic Engineering, Harbin Engineering University, Harbin 150001, China

<sup>†</sup> Ruqi Cai and Han Qin contributed equally to this work.

\*Corresponding author.

*E-mail address:* ge\_yuxianbo@126.com (X. Yu); yanfeng@hrbeu.edu.cn (F. Yan); xtzhang@hrbnu.edu.cn (X. Zhang)

### **Experimental Section**

**Chemicals.** All the chemicals were not further purified. Glycerol (C<sub>3</sub>H<sub>8</sub>O<sub>3</sub>, AR, 99%), isopropanol (C<sub>3</sub>H<sub>8</sub>O, AR, 99.7%), and sodium sulfide hydrate nine (Na<sub>2</sub>S·9H<sub>2</sub>O) were purchased from Aladdin Biochemical Science and Technology Co. LTD (Shanghai, China).

**Synthesis of MoGs.** Molybdenum-glycerate spheres (MoGs) were synthesized by solvent pyrolysis. Firstly, 200 mg of molybdenum pentachloride (MoCl<sub>5</sub>) and 19 mL

of glycerol were dispersed into 50 mL of isopropanol. The mixed solution was stirred for about 20 min until  $\text{MoCl}_5$  was completely dissolved and mixed to obtain a homogeneous mixed solution. The homogeneous mixed solution was then placed into a Teflon-lined autoclave and kept at  $200^\circ\text{C}$  for 3 h. After the solution was cooled down to room temperature, it was washed and centrifuged with water and absolute ethanol at a speed of 8000 r for 5 min. Finally, it was placed into an oven and kept at  $60^\circ\text{C}$  for 12 h and dried to a dark brown powder sample.

**Synthesis of EH-MoS<sub>2</sub>, EH-MoS<sub>2</sub>-3, and EH-MoS<sub>2</sub>-10.** Firstly, 120 mg of MoGs was dispersed with 300 mg of  $\text{Na}_2\text{S}\cdot 9\text{H}_2\text{O}$  into 60 mL of absolute ethanol, and the solution was stirred for 45 min until it was homogeneously dispersed. The above mixed solution was then transferred into a Teflon-lined autoclave and kept in an oven at  $180^\circ\text{C}$  for 6 h. After the solution was cooled to room temperature, it was washed and centrifuged with water and absolute ethanol. After dried in an oven at  $40^\circ\text{C}$  for 12 h, the EH-MoS<sub>2</sub> was obtained. Similarly, EH-MoS<sub>2</sub>-3 and EH-MoS<sub>2</sub>-10 were prepared under the same conditions as preparation of EH-MoS<sub>2</sub> except the reaction time of 3 h and 10 h at  $180^\circ\text{C}$  in a Teflon-lined autoclave.

**Synthesis of FH-MoS<sub>2</sub>.** To show the disadvantages of 1T phase, FH-MoS<sub>2</sub> (with 2H phase of MoS<sub>2</sub>) was prepared by annealing EH-MoS<sub>2</sub> at  $500^\circ\text{C}$  for 2 h under argon and hydrogen mixture ( $\text{H}_2/\text{Ar}$ ) gas.

#### **Materials characterization.**

The morphology and structure of all the catalysts were observed by the X-ray diffractometer (XRD, PANalytical X'Pert PRO), scanning electron microscope (SEM, Hitachi SU8010) and transmission electron microscope (TEM, Tecnai G<sup>2</sup> F30). The specific surface area of the sample and its adsorption properties were detected by specific surface area testing (BET, ASAP 2020). The chemical compositions and the vibrational rotational energy level were detected by the X-ray photoelectron spectroscopy (XPS, AXIS SUPRA+) and Raman spectroscopy (Raman, LabRAMHR800).

#### **Electrochemical Measurements.**

All the electrochemical measurements were performed by a two-electrode

configuration, and the CR2025-type coin cells were assembled in an argon-filled glove box with moisture and oxygen level <0.1 ppm with as-prepared materials as cathodes, polished Mg plates as anodes, and microporous membrane (Celgard 2400) as separators. The cathodes were prepared by mixing active material, with polyvinylidene difluoride (PVDF), and acetylene black at a weight ratio of 8:1:1 to form a homogeneous slurry and pasting onto the carbon fiber paper with the loading of 1.0 mg cm<sup>-2</sup>. All-phenyl complex (APC) electrolyte for MIBs was prepared as follows: 2.133 g of aluminium chloride (AlCl<sub>3</sub>) was slowly added into 24 mL of anhydrous tetrahydrofuran (THF) solution and vigorous stirring for 12 h, and then 16 mL of phenyl magnesium chloride (MgPhCl) solution in THF was added dropwise to form the APC electrolyte under vigorous stirring for another 12 h. EIS measurements were obtained in a frequency range from 0.1 Hz to 100 kHz.

Galvanostatic intermittent titration technique (GITT) was carried out using a multichannel battery test system. The batteries were measured for 5 min discharge and 15 min relaxing time at the current density of 20 mA g<sup>-1</sup>. The diffusion coefficient can be calculated by Fick' second law:

$$D = \frac{4}{\pi\tau} \left( \frac{m_b V_m}{M_b S} \right)^2 \left( \frac{\Delta E_s}{\Delta E_t} \right)^2$$

where  $\tau$  is the time of current pulse.  $V_m$ ,  $m_b$ , and  $M_b$  represent molar volume, the mass, and molar mass of materials, respectively.  $S$  is the contact area of electrode/electrolyte.  $\Delta E_s$  and  $\Delta E_t$  are the steady-state potential change by the current pulse and potential change during the constant current, which are eliminated with the  $IR$  drop.

### **Computational methods.**

The density functional theory (DFT) calculations were performed using the projector augmented wave (PAW). The generalized gradient approximation in the form of the Perdew–Burke–Ernzerhof functional with a cut-off energy of 500 eV to calculate exchange-correlation energy. The energy convergence was 10<sup>-5</sup> eV and the geometry optimizations forces used the convergence criterion of 0.01 eV Å<sup>-1</sup>. The transition states were localized using the climbing image nudged elastic band method (CI-NEB) as implemented in the Transition State Tools for VASP module. A bilayer model has been

used for MoS<sub>2</sub> in this work with  $4 \times 4 \times 1$  supercell with a vacuum larger than 10 Å, sampled with  $3 \times 3 \times 1$  Monkhorst-Pack grid; the interlayer distances were fixed to 6.25 and 7.27 Å.

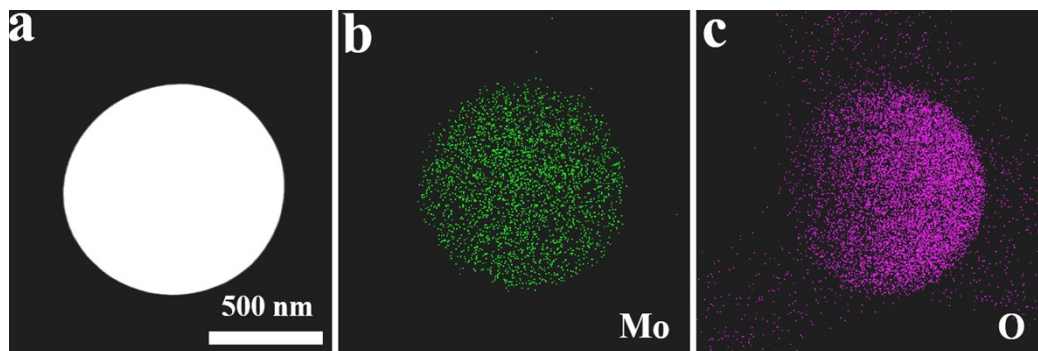

**Fig. S1** (a-c) EDS element mapping images of the MoG nanosphere.

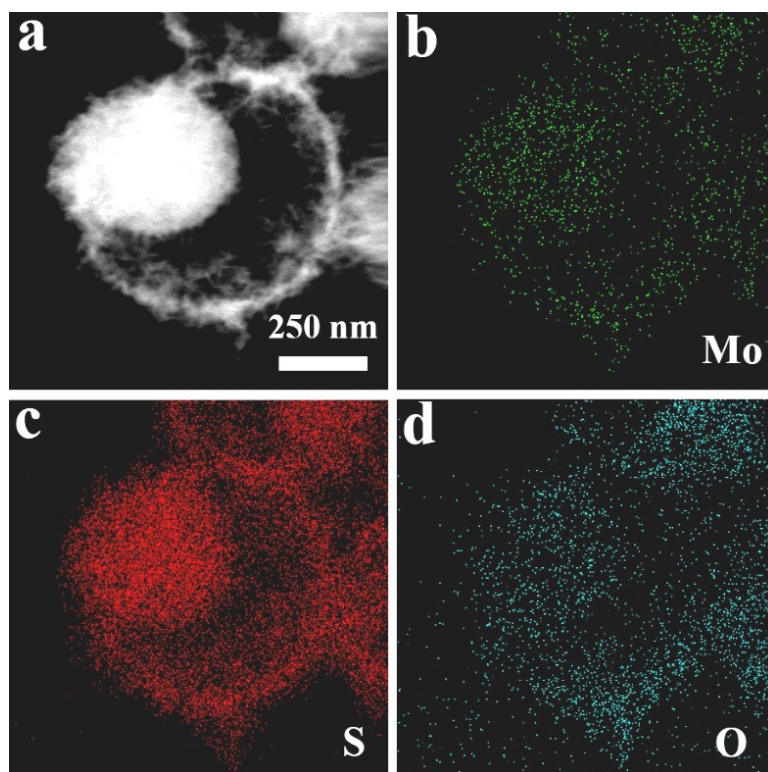

**Fig. S2** (a-d) EDS element mapping images of the EH-MoS<sub>2</sub>-3 nanosphere.

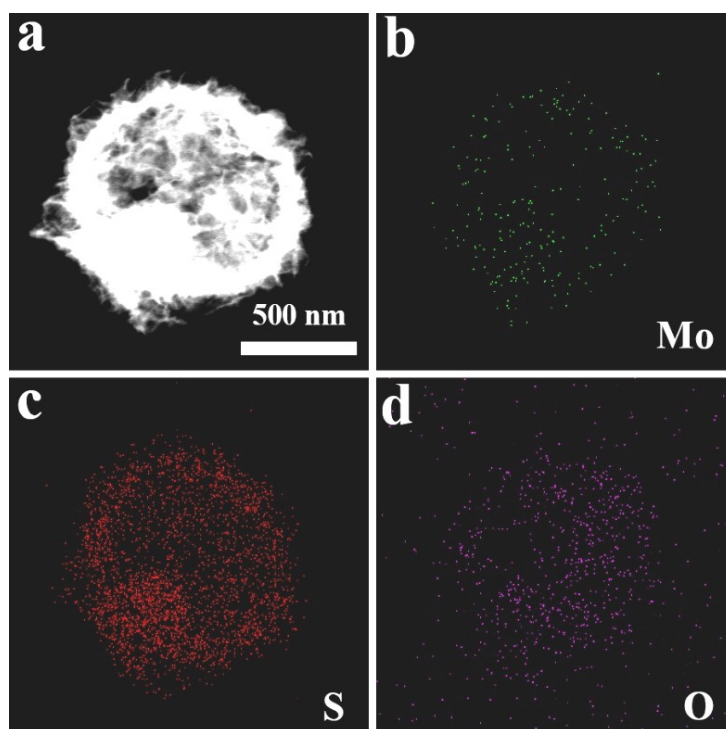

**Fig. S3** (a-d) EDS element mapping images of the EH-MoS<sub>2</sub>-5 nanosphere.

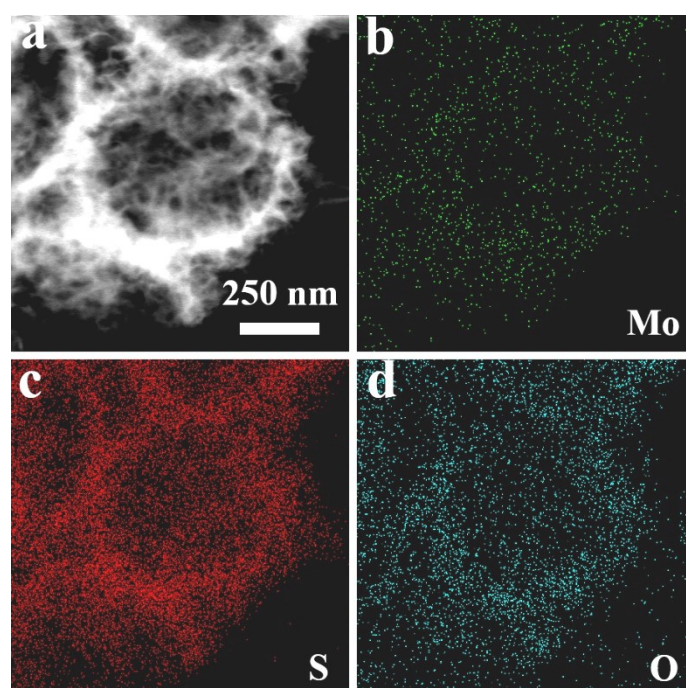

**Fig. S4** (a-d) EDS element mapping images of the EH-MoS<sub>2</sub> nanosphere.

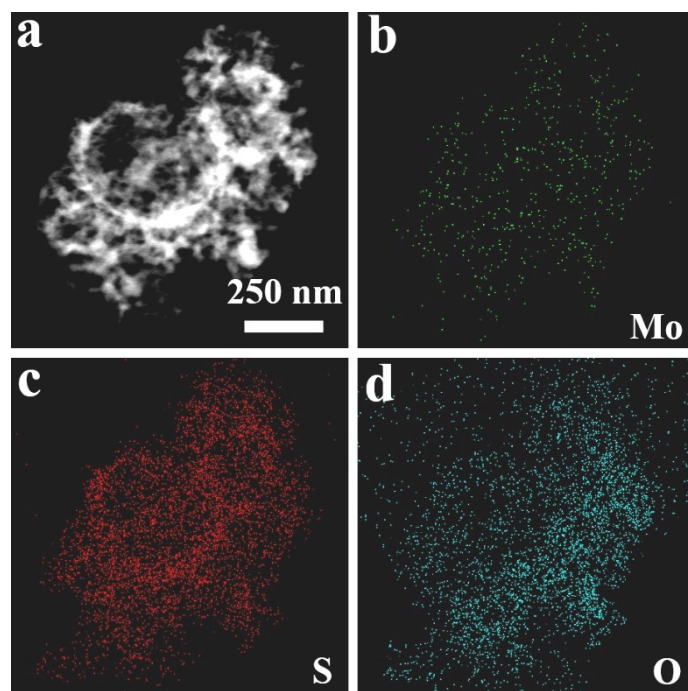

**Fig.S5** (a-d) EDS element mapping images of an individual EH-MoS<sub>2</sub>-10 nanosphere.

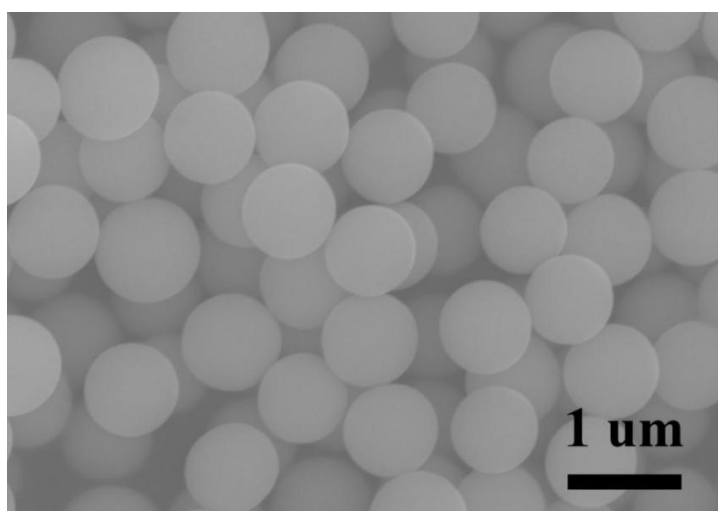

**Fig. S6** SEM image of MoGs.

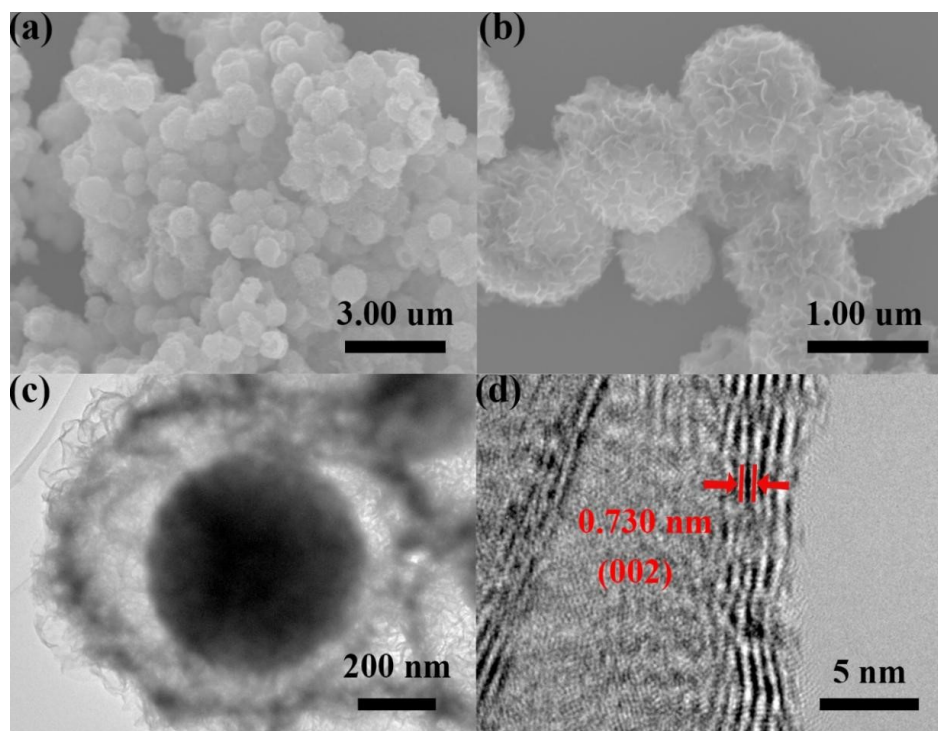

**Fig. S7** (a,b) SEM, (c) TEM, and (d) HRTEM images of EH-MoS<sub>2</sub>-3.

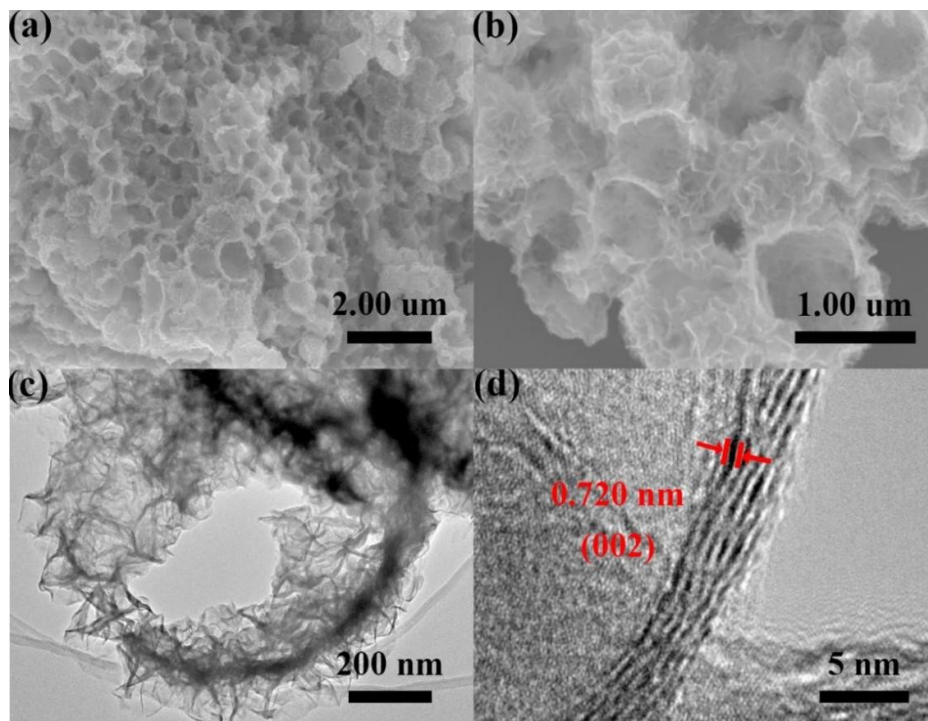

**Fig. S8** (a,b) SEM, (c) TEM, and (d) HRTEM images of EH-MoS<sub>2</sub>-10.

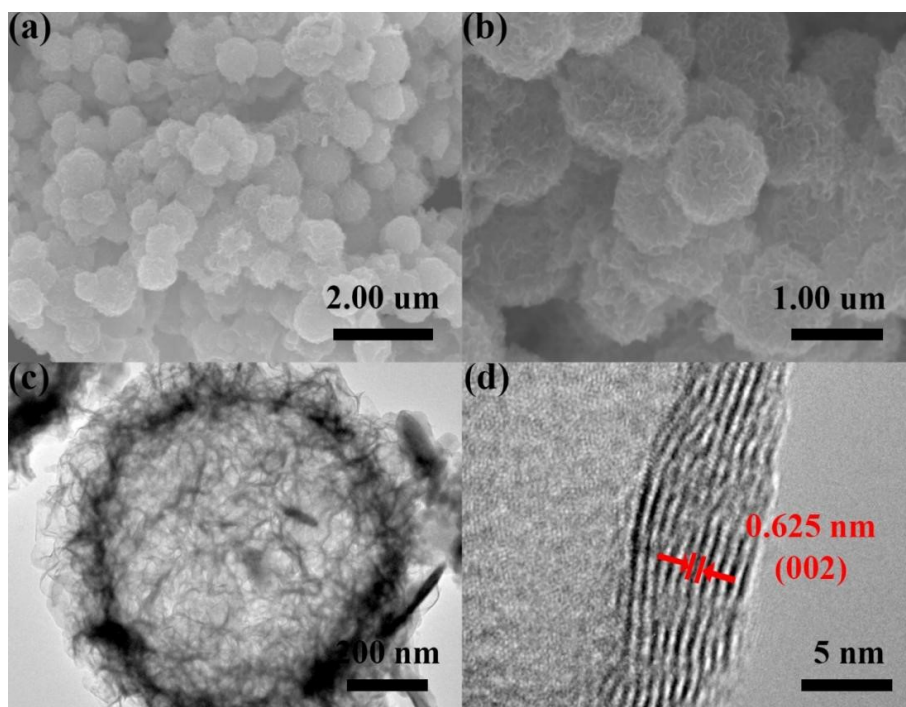

Fig. S9 (a,b) SEM, (c) TEM, and (d) HRTEM images of FH-MoS<sub>2</sub>.

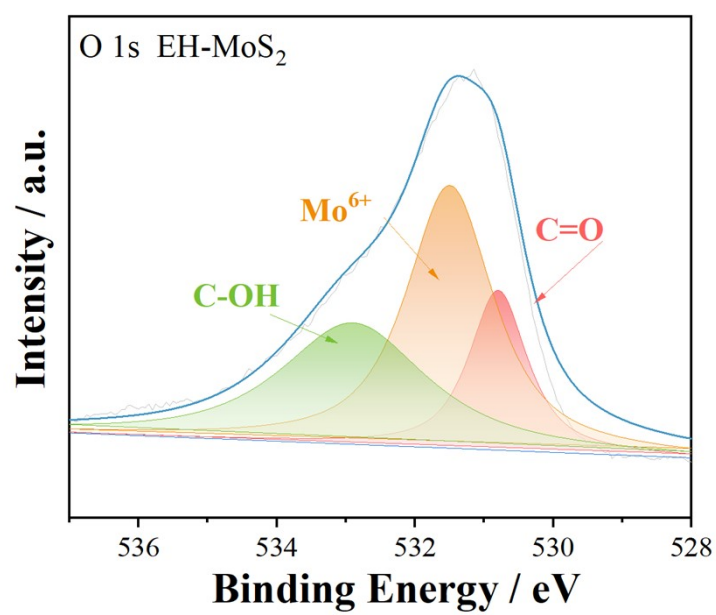

Fig. S10 XPS spectrum of O 1s of EH-MoS<sub>2</sub>.



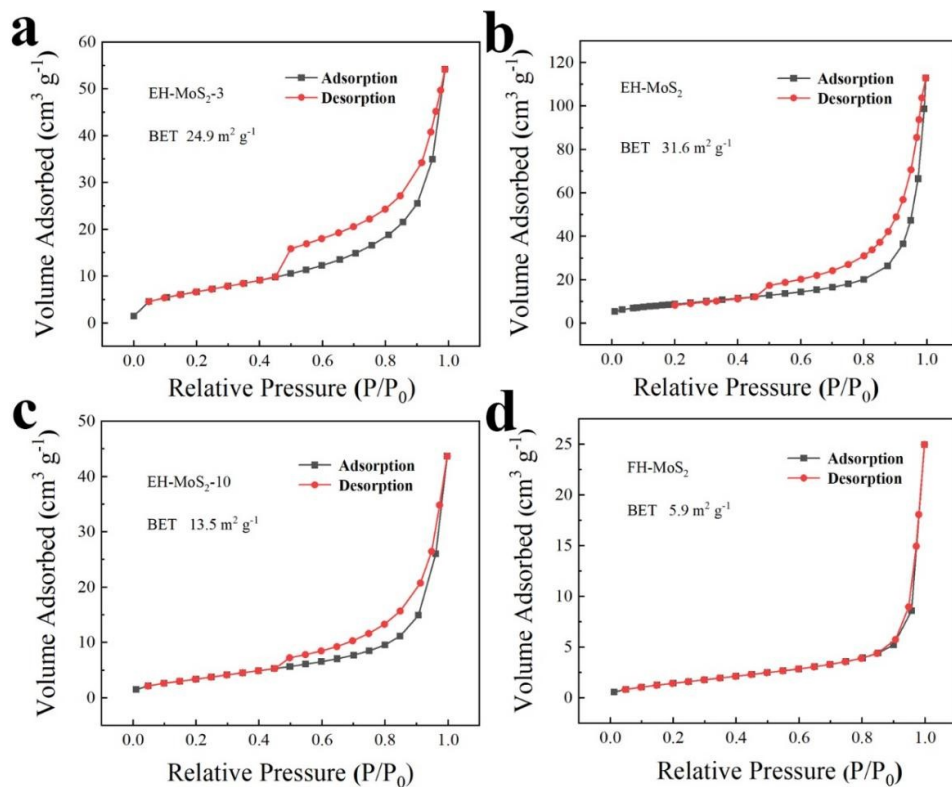

**Fig. S11** Nitrogen adsorption and desorption isotherms of (a) EH-MoS<sub>2</sub>-3, (b) EH-MoS<sub>2</sub>, (c) EH-MoS<sub>2</sub>-10, and (d) FH-MoS<sub>2</sub>.

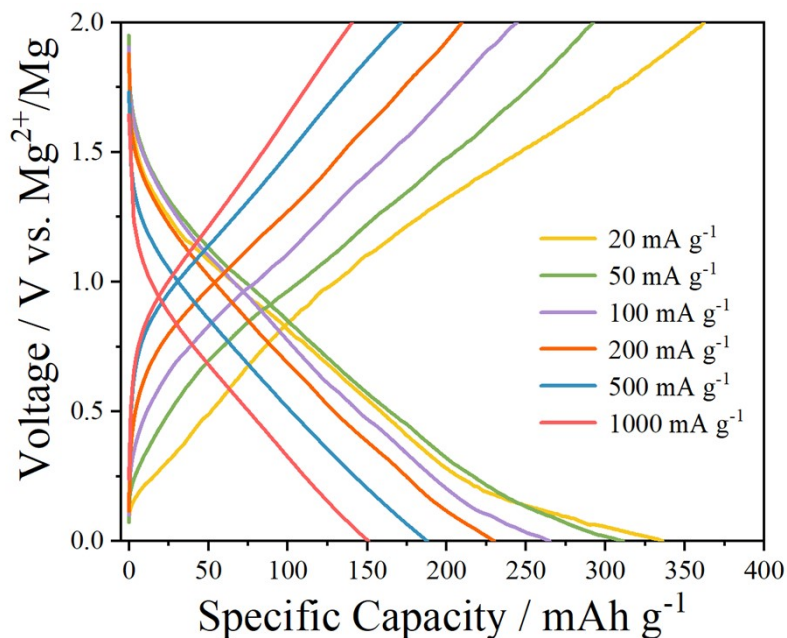

**Fig. S12** Galvanostatic charge/discharge curves of EH-MoS<sub>2</sub> at different current densities.

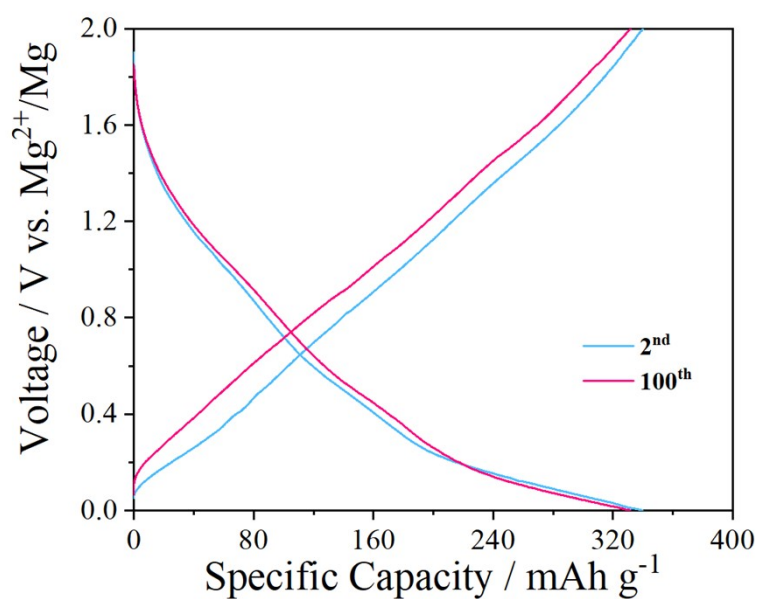

**Fig. S13** Galvanostatic charge/discharge curves of EH-MoS<sub>2</sub>.

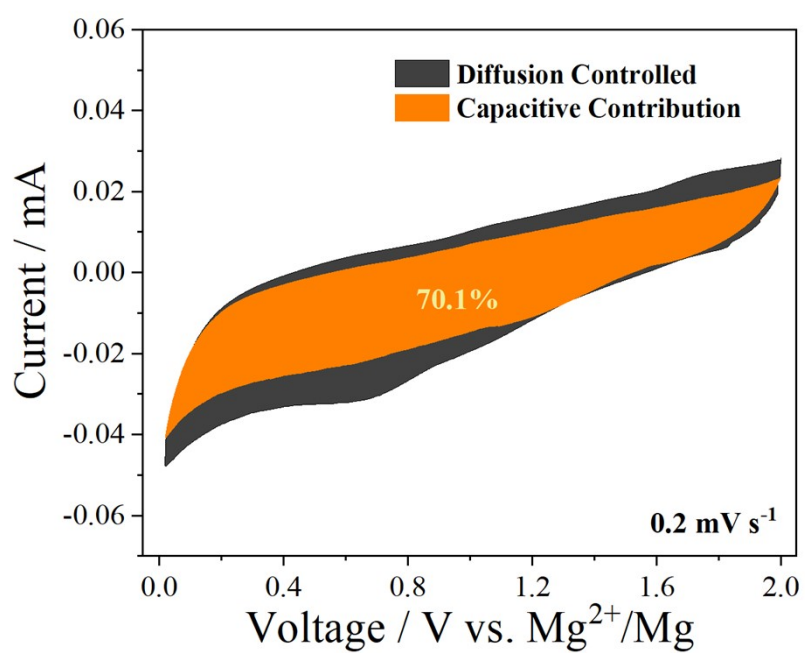

**Fig. S14** The capacitive and diffusion-controlled contributions of EH-MoS<sub>2</sub> at the scan rate of 0.2 mV s<sup>-1</sup>.

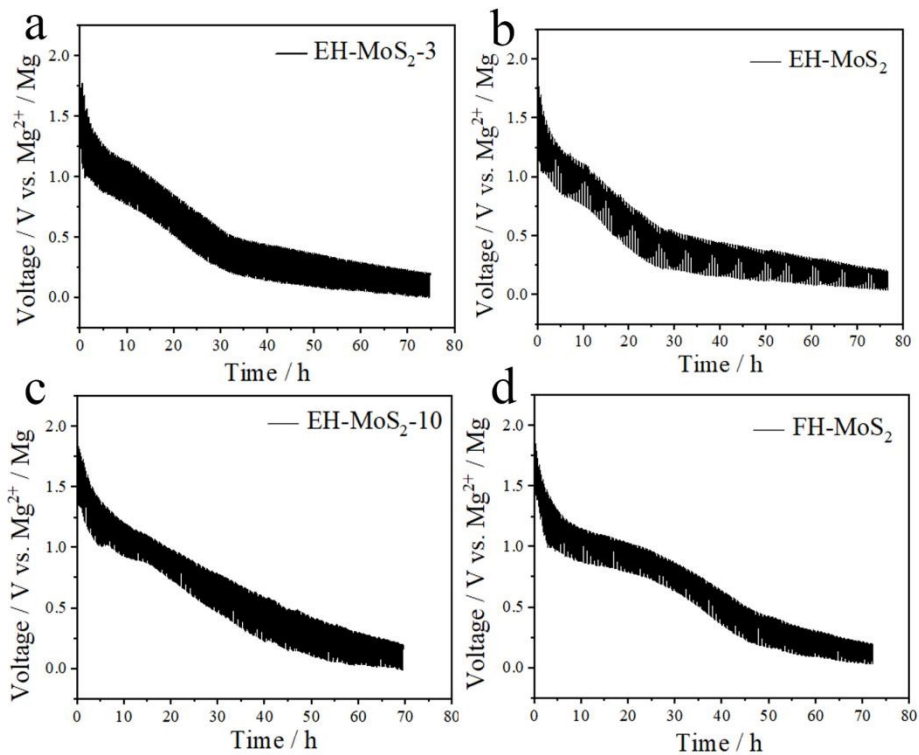

**Fig. S15** (a-d) GITT profiles of the discharge process of EH-MoS<sub>2</sub>-3, EH-MoS<sub>2</sub>, EH-MoS<sub>2</sub>-10, and FH-MoS<sub>2</sub>.

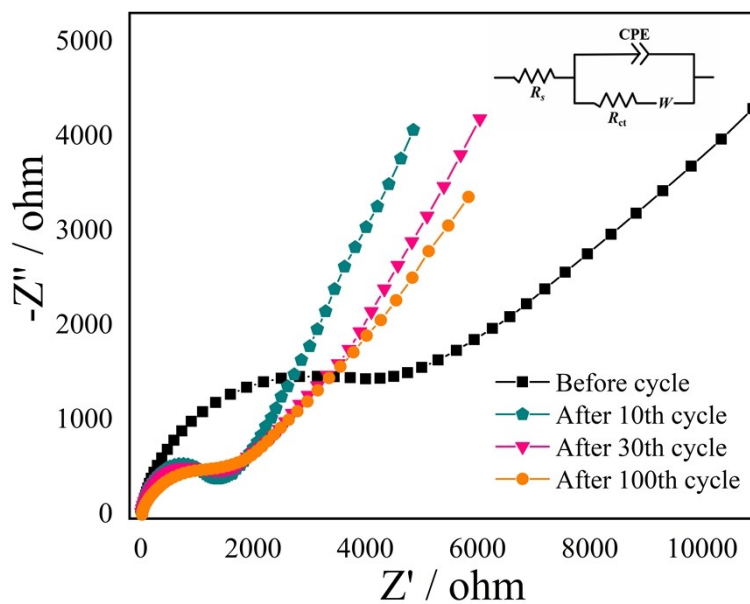

**Fig. S16** Nyquist plots and the corresponding equivalent circuit diagram of EH-MoS<sub>2</sub> after different cycles.

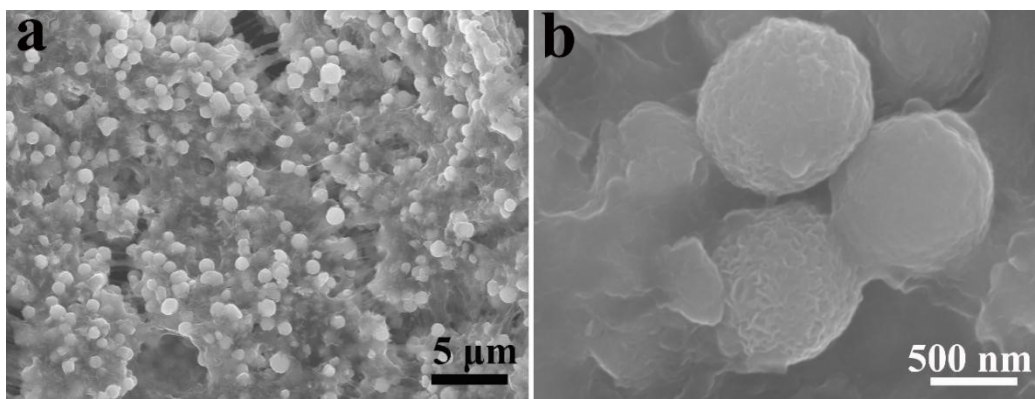

**Fig. S17** (a,b) SEM images of EH-MoS<sub>2</sub> after 200 cycles charge–discharge process.

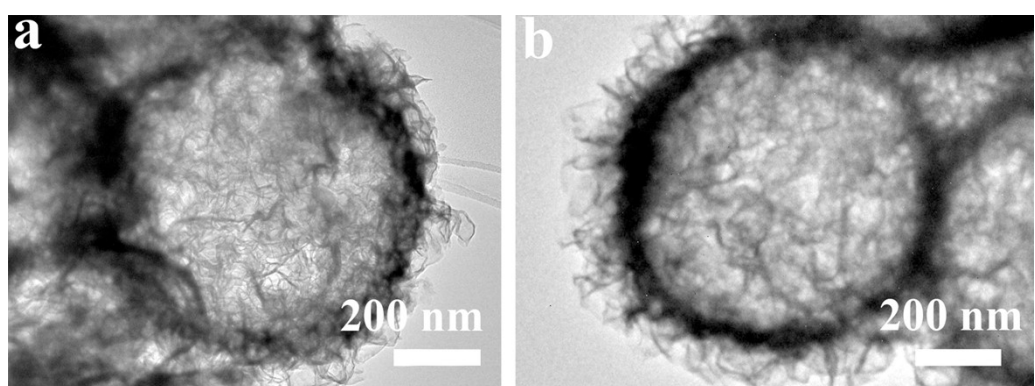

**Fig. S18** TEM images of EH-MoS<sub>2</sub> after (a) fully charged and (b) fully discharged states.

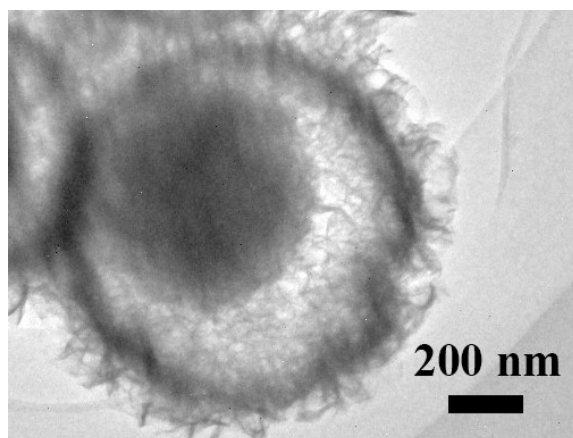

**Fig. S19** TEM image of EH-MoS<sub>2</sub>-3 after fully charged state.

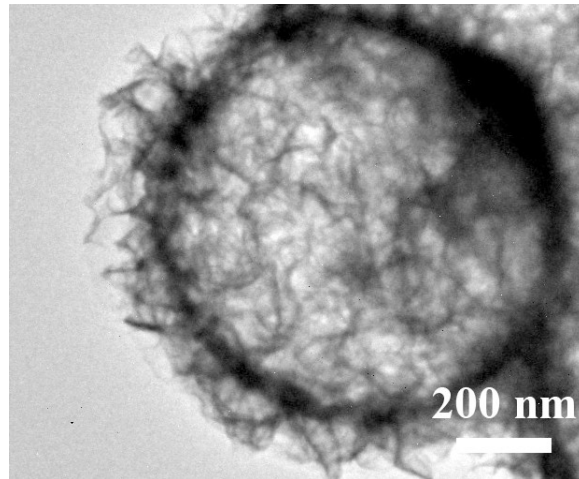

**Fig. S20** TEM image of FH-MoS<sub>2</sub> after fully charged state.

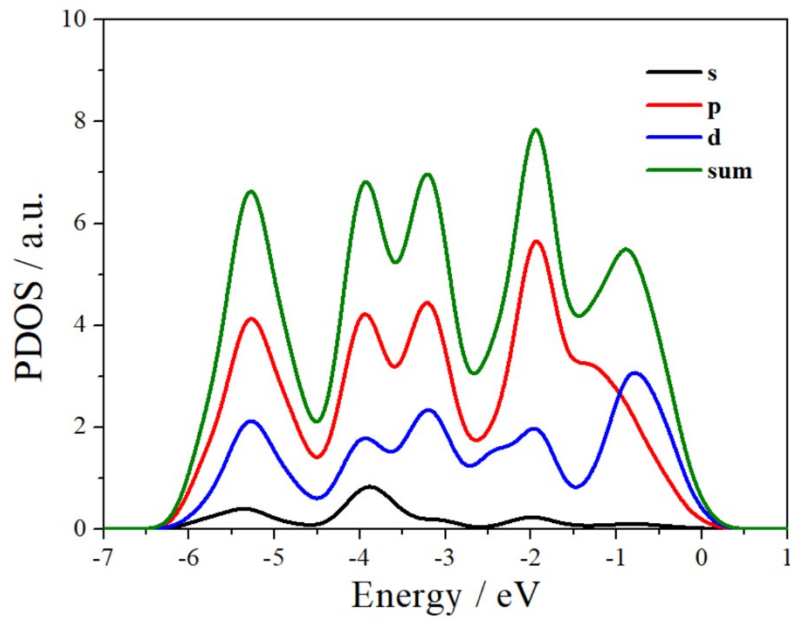

**Fig. S21** DOS of EH-MoS<sub>2</sub>.

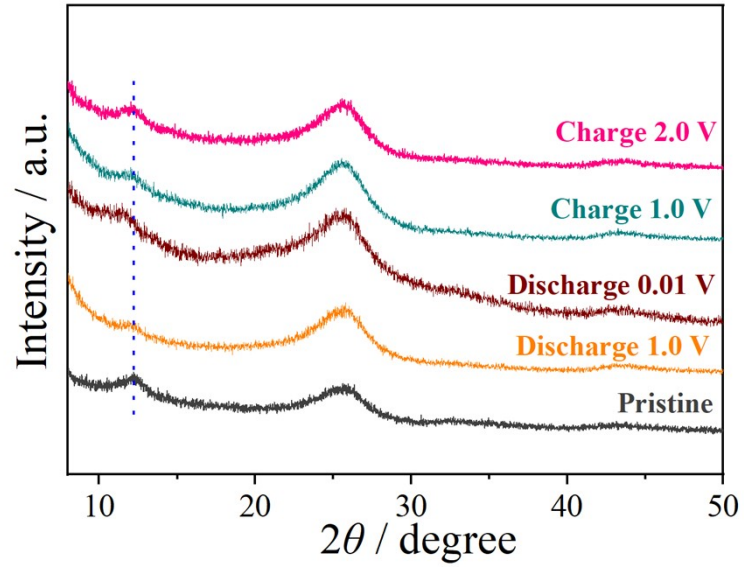

**Fig. S22** *Ex situ* XRD patterns of EH-MoS<sub>2</sub> at different voltage test during charge–discharge processes

**Table S1.** Comparison of electrochemical performance of EH-MoS<sub>2</sub> with other previously reported cathode materials for MIBs.

| Electrode material                                             | Current Density (mA g <sup>-1</sup> ) | Reversible Capacity (mAh g <sup>-1</sup> ) | Cycle Numbers ( <i>n</i> ) | Average Potential of Electrodes (V) | Ref.      |
|----------------------------------------------------------------|---------------------------------------|--------------------------------------------|----------------------------|-------------------------------------|-----------|
| EH-MoS <sub>2</sub>                                            | 20                                    | 327.7                                      | 200                        | 0.51                                | This work |
|                                                                | 1000                                  | 135.9                                      | 2000                       |                                     |           |
| Li <sub>3</sub> V <sub>2</sub> (PO <sub>4</sub> ) <sub>3</sub> | 100                                   | 135                                        | 200                        | 0.40                                | Ref.1     |
| V <sub>2</sub> C MXene                                         | 50                                    | ~110                                       | 480                        | 0.38                                | Ref.2     |
| Cu <sub>2</sub> Se                                             | 26                                    | ~110                                       | 30                         | 0.36                                | Ref.3     |
| Cu <sub>2</sub> Se/rGO                                         | 26                                    | ~65                                        | 100                        |                                     |           |
| LiCrTiO <sub>4</sub>                                           | 20                                    | ~125                                       | 30                         | 0.44                                | Ref.4     |
| Ti <sub>3</sub> C <sub>2</sub> T <sub>x</sub> /CNT             | 100                                   | ~80                                        | 500                        | 0.35                                | Ref.5     |
| MoSe <sub>2</sub> /C                                           | 200                                   | 89                                         | 100                        | 0.42                                | Ref.6     |
| V <sub>2</sub> MoO <sub>8</sub>                                | 20                                    | 135                                        | 50                         | 0.45                                | Ref.7     |
| VS <sub>2</sub> -GO                                            | 90                                    | 200                                        | 100                        | 0.46                                | Ref.8     |
| MoS <sub>2</sub> Nano Flowers                                  | 1000                                  | 107                                        | 2300                       | 0.41                                | Ref.9     |
| MoS <sub>2</sub> /G VH                                         | 20                                    | 260.8                                      | 200                        | 0.50                                | Ref.10    |
|                                                                | 1000                                  | 145.8                                      | 2200                       |                                     |           |
| VO <sub>2</sub>                                                | 20                                    | 154.9                                      | 100                        | 0.49                                | Ref.11    |

## References

- [1] M. Rashad, H. Zhang, X. Li, H. Zhang, Fast kinetics of Mg<sup>2+</sup>/Li<sup>+</sup> hybrid ions in a polyanion Li<sub>3</sub>V<sub>2</sub>(PO<sub>4</sub>)<sub>3</sub> cathode in a wide temperature range, *J. Mater. Chem. A* 7 (16) (2019) 9968–9976,
- [2] F. Liu, Y. Liu, X. Zhao, K. Liu, H. Yin, L.-Z. Fan, Prelithiated V<sub>2</sub>C MXene: A high-performance electrode for hybrid magnesium/lithium-ion batteries by ion coinsertion, *Small* 16 (2020) 1906076,
- [3] H. Yuan, N. Wang, Y. NuLi, J. Yang, J. Wang, Hybrid Mg Cu<sup>2+</sup> /Li<sup>+</sup> batteries with

- Se cathode based on displacement reaction, *Electrochim. Acta* 261 (2018) 503–512,
- [4] Y. Yao, L. Zhang, X. Bie, H. Chen, C. Wang, F. Du, G. Chen, Exploration of spinel  $\text{LiCrTiO}_4$  as cathode material for rechargeable Mg-Li hybrid batteries, *Chem. Eur. J.* 23 (71) (2017) 17935–17939,
- [5] A. Byeon, M.-Q. Zhao, C.E. Ren, J. Halim, S. Kota, P. Urbankowski, B. Anasori, M. W. Barsoum, Y. Gogotsi, Two-dimensional titanium carbide MXene as a cathode material for hybrid magnesium/lithium-ion batteries, *ACS Appl. Mater. Interfaces* 9 (5) (2017) 4296–4300,
- [6] J.-J. Fan, S.-Y. Shen, Y. Chen, L.-N. Wu, J. Peng, X.-X. Peng, C.-G. Shi, L. Huang, W.-F. Lin, S.-G. Sun, A rechargeable  $\text{Mg}^{2+}/\text{Li}^+$  hybrid battery based on sheet-like  $\text{MoSe}_2/\text{C}$  nanocomposites cathode. *Electrochem. Commun.* 90 (2018) 16–20,
- [7] X. Miao, Z. Chen, N. Wang, Y. Nuli, J. Wang, J. Yang, S. Hirano, Electrospun  $\text{V}_2\text{MoO}_8$  as a cathode material for rechargeable batteries with Mg metal anode, *Nano Energy* 34 (2017) 26–35,
- [8] R. Sun, C. Pei, J. Sheng, D. Wang, L. Wu, S. Liu, Q. An, L. Mai, High-rate and long-life  $\text{VS}_2$  cathodes for hybrid magnesium-based battery, *Energy Storage Mater.* 12 (2018) 61–68,
- [9] Y. Ju, Y. Meng, Y. Wei, X. Bian, Q. Pang, Y. Gao, F. Du, B. Liu, G. Chen,  $\text{Li}^+/\text{Mg}^{2+}$  hybrid-ion batteries with long cycle life and high rate capability employing  $\text{MoS}_2$  nanoflowers as the cathode material, *Chem. Eur. J.* 22 (2016) 18073–18079.
- [10] X. Yu, G. Zhao, C. Liu, C. Wu, H. Huang, J. He, N. Zhang, A  $\text{MoS}_2$  and graphene alternately stacking van der Waals heterostructure for  $\text{Li}^+/\text{Mg}^{2+}$  co-intercalation, *Adv. Funct. Mater.* 31 (2021) 2103214.
- [11] C. Pei, F. Xiong, J. Sheng, Y. Yin, S. Tan, D. Wang, C. Han, Q. An, L. Mai,  $\text{VO}_2$  nanoflakes as the cathode material of hybrid magnesium-lithium-ion batteries with high energy density, *ACS Appl. Mater. Interfaces* 9 (2017) 17060–17066.
